# Supplementary material
Source: publisher site journal article supplement (https://www.dovepress.com/article/399622)
Supplement: Supplementary file 1 [file get_supplementary_file.php]

**Attached table** Major gram-negative bacteria resistant to common major antimicrobials (without removing duplicate strains from similar specimens from the same patients).

| Antibiotics | Total | Sensitivity (n) | Sensitivity rates (%) | Intermediate sensitivity (n) | Intermediate sensitivity rates (%) | Resistance  (n) | Resistance rates (%) |
| --- | --- | --- | --- | --- | --- | --- | --- |
| Amikacin | 539 | 313 | 58.07 | 12 | 02.23 | 214 | 39.70 |
| Meropenem | 539 | 226 | 41.93 | 20 | 03.71 | 293 | 54.36 |
| trimethoprim-Sulfa methoxazole | 433 | 152 | 35.10 | 0 | 0 | 281 | 64.90 |
| Ciprofloxacin | 539 | 138 | 25.60 | 18 | 03.34 | 383 | 71.06 |
| Ampicillin Sulbactam | 416 | 21 | 05.05 | 50 | 12.02 | 345 | 82.93 |
| Ampicillin | 138 | 0 | 0 | 0 | 0 | 138 | 1 |
| [aztreonam](javascript:;) | 353 | 42 | 11.90 | 23 | 06.52 | 288 | 81.59 |
| Tigecycline | 405 | 402 | 99.26 | 3 | 00.74 | 0 | 0 |
| Gentamicin | 539 | 232 | 43.04 | 15 | 02.78 | 292 | 54.17 |
| Levofloxacin | 539 | 144 | 26.72 | 25 | 04.64 | 370 | 68.65 |
| Tobramycin | 539 | 231 | 42.86 | 23 | 04.27 | 285 | 52.88 |
| Cefoxitin | 230 | 161 | 70.00 | 16 | 06.96 | 53 | 23.04 |
| Ceftriaxone | 433 | 0 | 0 | 1 | 00.23 | 432 | 99.77 |
| Cefotaxime | 433 | 2 | 00.46 | 0 | 0 | 431 | 99.54 |
| Cefazolin | 230 | 0 | 0 | 0 | 0 | 230 | 1 |
| Cefuroxime | 230 | 0 | 0 | 0 | 0 | 230 | 1 |
| Cefepime | 539 | 50 | 09.28 | 20 | 03.71 | 469 | 87.01 |
| Ceftazidime | 539 | 39 | 07.24 | 23 | 04.27 | 477 | 88.50 |
| Piperacillin tazobactam | 353 | 174 | 49.29 | 25 | 07.08 | 154 | 43.63 |
| Ertapenem | 247 | 185 | 74.90 | 1 | 00.40 | 61 | 24.70 |
| Imipenem | 347 | 201 | 57.93 | 2 | 00.58 | 144 | 41.50 |
